# Supplementary material for: RNA viromics of Southern California wastewater and detection of SARS-CoV-2 single nucleotide variants
Source: bioRxiv or medRxiv preprint supplement (doi:10.1101/2021.07.19.21260815), 2021-07-22
Supplement: Supplementary file [file media-5.pdf]

1 Supplemental information for:

2

3 RNA viromics of Southern California wastewater and detection of SARS-CoV-2 single  
4 nucleotide variants.

5

6 Jason A. Rothman<sup>a#</sup>, Theresa B. Loveless<sup>b</sup>, Joseph Kapcia III<sup>a</sup>, Eric D. Adams<sup>a</sup>, Joshua A.  
7 Steele<sup>c</sup>, Amity G. Zimmer-Faust<sup>c</sup>, Kylie Langlois<sup>c</sup>, David Wanless<sup>c</sup>, Madison Griffith<sup>c</sup>, Lucy  
8 Mao<sup>c</sup>, Jeffrey Chokry<sup>c</sup>, John F. Griffith<sup>c</sup>, Katrine L. Whiteson<sup>a#</sup>

9

10 <sup>a</sup> Department of Molecular Biology and Biochemistry, University of California, Irvine, Irvine,  
11 CA, USA.

12 <sup>b</sup> Department of Biomedical Engineering, University of California, Irvine, Irvine, CA, USA.

13 <sup>c</sup> Southern California Coastal Water Research Project, Costa Mesa, CA, USA

14

15 # Co-corresponding authors: Jason A. Rothman, University of California, Irvine, Irvine, CA,  
16 92697, (949) 824-3509, rothmanj@uci.edu. Katrine L. Whiteson, University of California,  
17 Irvine, Irvine, CA, 92697, (949) 824-9032, katrine@uci.edu.

18

19

20

21

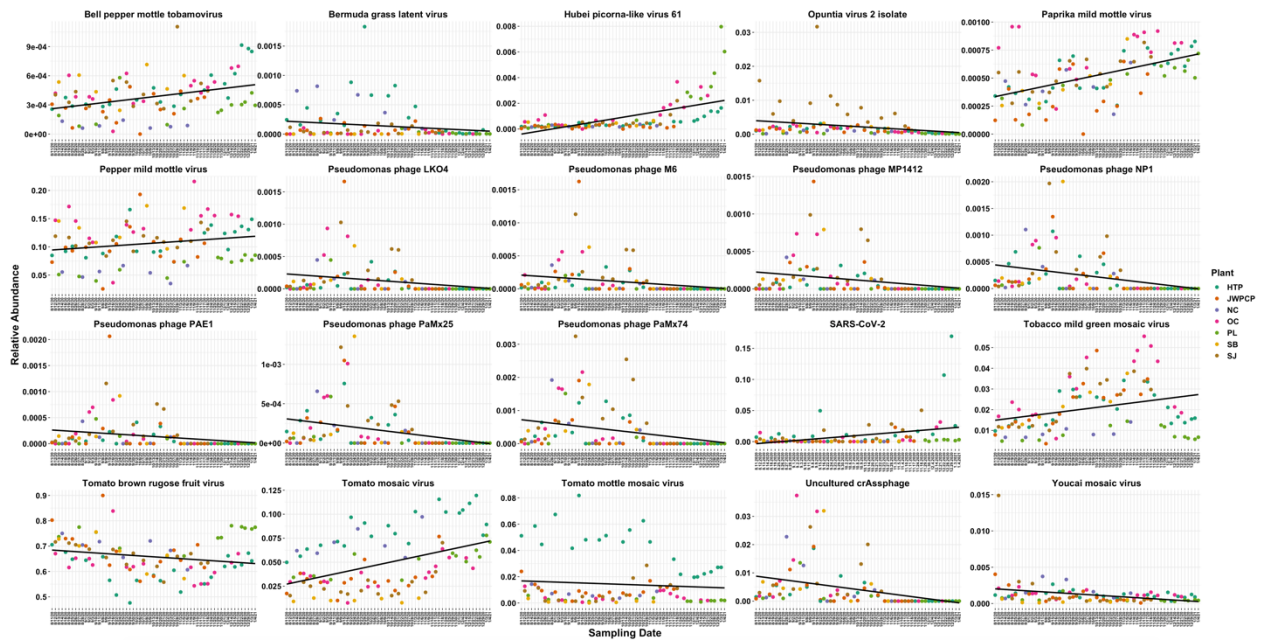

22

23

24 Figure S1: Relative abundances of viruses in unenriched samples (except note below) that  
 25 significantly changed over time (LME  $P_{adj} < 0.05$ ) colored by WTP. Sample dates run left to  
 26 right (oldest to most recent) along the “x” axis. Note, that SARS-CoV-2 was measured and tested  
 27 in enriched samples only (LME  $P_{adj} < 0.05$ ).

28

29 Supplemental File SF1: SARS-CoV-2 RT-ddPCR quantification data, county-reported daily  
 30 COVID-19 counts, and seven-day rolling averages for each sample.

31

32 Supplemental File SF2: Genomic coverage, breadth, and descriptive statistics of SARS-CoV-2  
 33 sequences for each sample.

34

35 Supplemental File SF3: Sequencing depth and Single Nucleotide Variant analyses for SARS-  
 36 CoV-2 per sample after masking potentially problematic sites.

37

38 Supplemental File SF4: Sample metatranscriptomic sequencing metadata.
